# Supplementary material for: Synthesis, characterization and computational study of an ilmenite-structured Ni3Mn3Ti6O18thin film photoanode for solar water splitting
Source: Royal Society of Chemistry journal article supplement (doi:10.1039/c9nj00457b), 2019-01-01
Supplement: c9nj00457b1.pdf [file c9nj00457b1.pdf]

## Electronic Supporting Information (ESI)

### Synthesis, Characterization and Computational Study of Ilmenite-Structured $\text{Ni}_3\text{Mn}_3\text{Ti}_6\text{O}_{18}$ Thin Film Photoanode for Solar Water Splitting

Khadija Munawar<sup>a</sup>, Fouzia Perveen<sup>b</sup>, Muhammad Mehmood Shahid<sup>c</sup>, Wan Jeffrey Basirun<sup>a</sup>,  
Misni Bin Misran<sup>a</sup> and Muhammad Mazhar<sup>ad\*</sup>

<sup>a</sup>*Department of Chemistry, Faculty of Science, University of Malaya, Kuala Lumpur 50603, Malaysia.  
mazhar42pk@yahoo.com*

<sup>b</sup>*Research Center for Modeling and Simulation (RCMS), National University of Sciences and Technology (NUST), Islamabad, 44000, Pakistan*

<sup>c</sup>*Higher Institution Centre of Excellence (HICoE), UM Power Energy Dedicated Advanced Centre (UMPEDAC), Level 4, Wisma R&D University of Malaya, Jalan Pantai Baharu 59990 Kuala Lumpur, Malaysia.*

<sup>d</sup>*Department of Environmental Sciences, Faculty of Science, Fatima Jinnah Women University, Rawalpindi 46000, Pakistan, and School of Natural Sciences (SNS), National University of Sciences and Technology (NUST), Islamabad, 44000, Pakistan Fax: +92-51- 9292904; Mobile: 00-92-300-5193859.*

*Corresponding Author: mazhar42pk@yahoo.com*

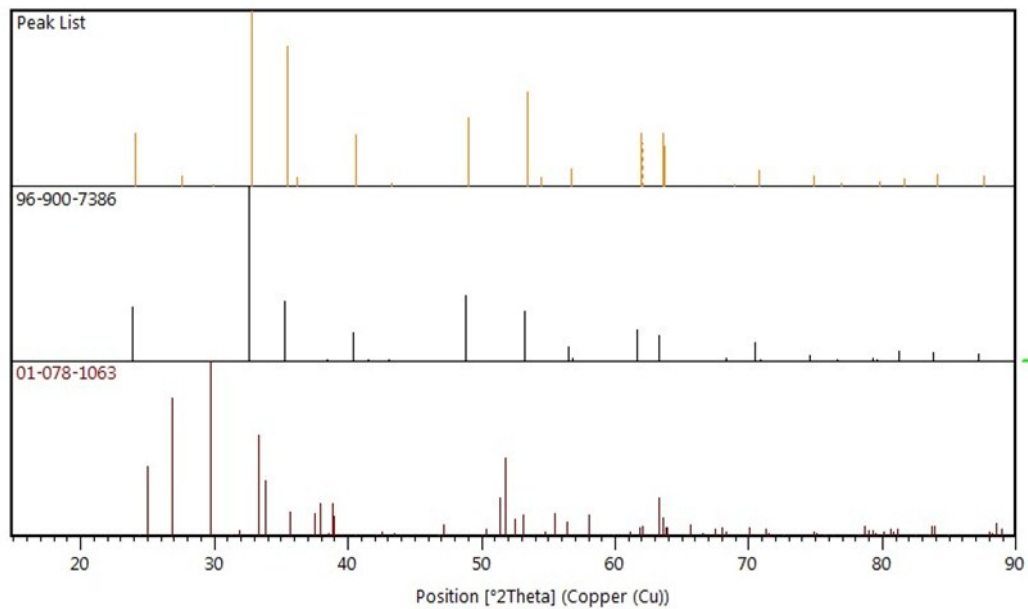

**Figure S1.** Stick pattern matching of  $\text{Ni}_3\text{Mn}_3\text{Ti}_6\text{O}_{18}$  thin film with respective standard cards of individual components.

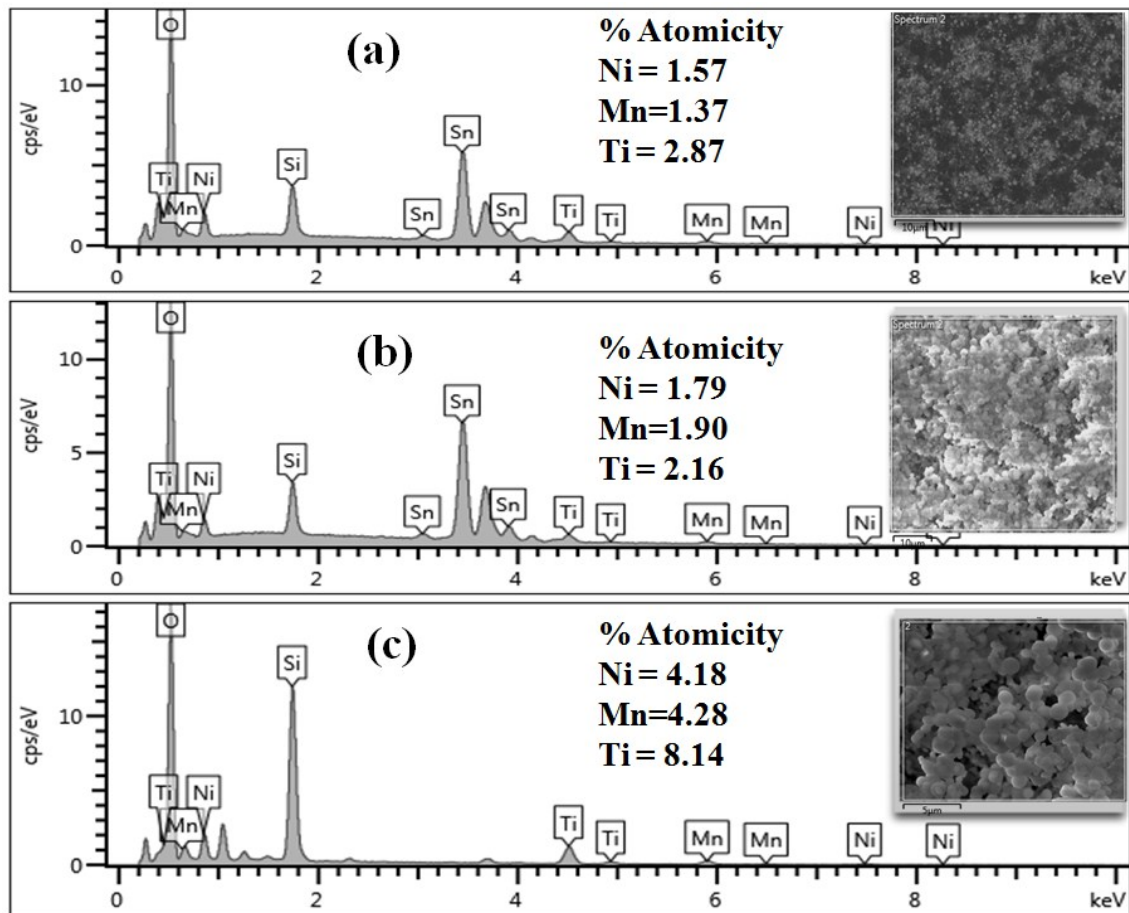

**Figure S2.** EDX spectrum recorded for  $\text{Ni}_3\text{Mn}_3\text{Ti}_6\text{O}_{18}$  thin film deposited on FTO substrate by AACVD at (a) 575, (b) 600 and (c) 625 °C for 45 minutes under Ar atmosphere.

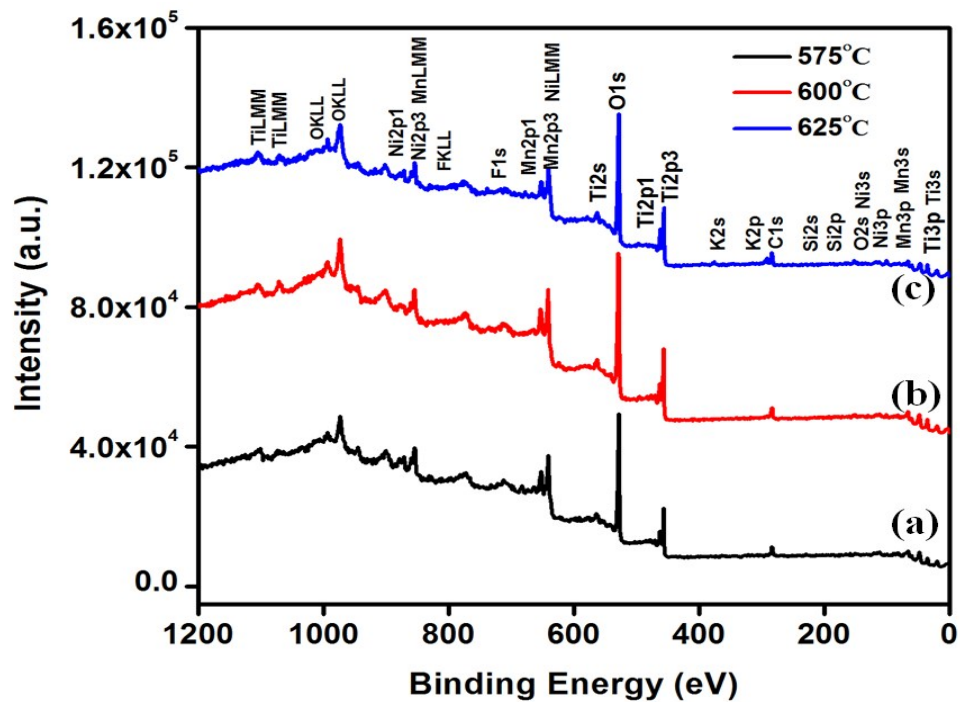

**Figure S3.** Survey scan XPS spectrum of  $\text{Ni}_3\text{Mn}_3\text{Ti}_6\text{O}_{18}$  thin film deposited on FTO substrate by AACVD at (a) 575, (b) 600 and (c) 625 °C for 45 minutes under Ar atmosphere.
